# Supplementary material
Source: Royal Society of Chemistry journal article supplement (doi:10.1039/d6ce00334f)
Supplement: d6ce00334f1.pdf [file d6ce00334f1.pdf]

## Supporting information

### **A Novel Defect-Selective Etching Method for $\beta$ -Ga<sub>2</sub>O<sub>3</sub> Single Crystals Based on Hydrofluoric Acid**

Fanyi Yin<sup>1</sup>, Jiaxiang He<sup>1</sup>, Yuchao Yan<sup>1,\*</sup>, Xinyu Yan<sup>1</sup>, Defan Wu<sup>1,2,\*</sup>, Zhu Jin<sup>1,2</sup>, Ning Xia<sup>3</sup>,  
Hui Zhang<sup>1,2,\*</sup>, Deren Yang<sup>1,2</sup>

1 State Key Laboratory of Silicon and Advanced Semiconductor Materials, School of Materials Science and Engineering, Zhejiang University, Hangzhou, Zhejiang 310027, People's Republic of China

2 ZJU-Hangzhou Global Scientific and Technological Innovation Center, Hangzhou, Zhejiang 311200, People's Republic of China

3 Hangzhou Garen Semiconductor Co., Ltd, Hangzhou, Zhejiang 311200, People's Republic of China

\*Authors to whom correspondence should be addressed: 12526001@zju.edu.cn, wdfan@zju.edu.cn and msezhanghui@zju.edu.cn

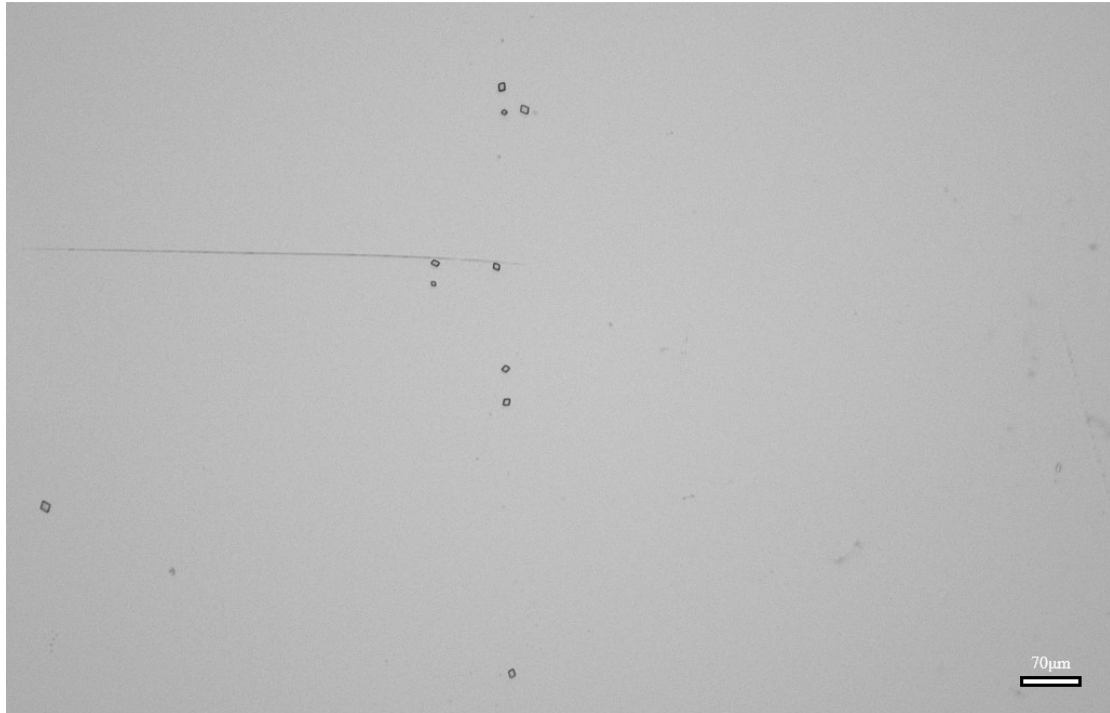

Fig. S1 Optical microscope image of the (001)-oriented surface etched in mixed solution of HF and HNO<sub>3</sub> at 60 °C for 4h

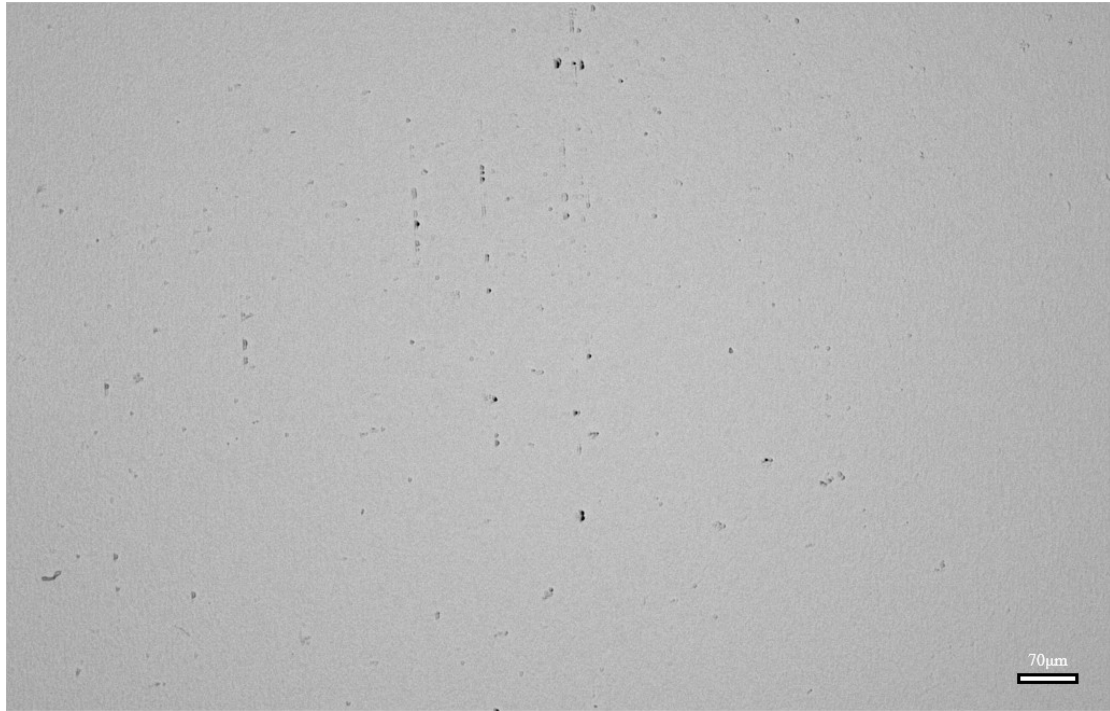

Fig. S2 Optical microscope image of the  $(\bar{2}01)$ -oriented surface etched in mixed solution of HF and  $\text{HNO}_3$  at 60 °C for 4h

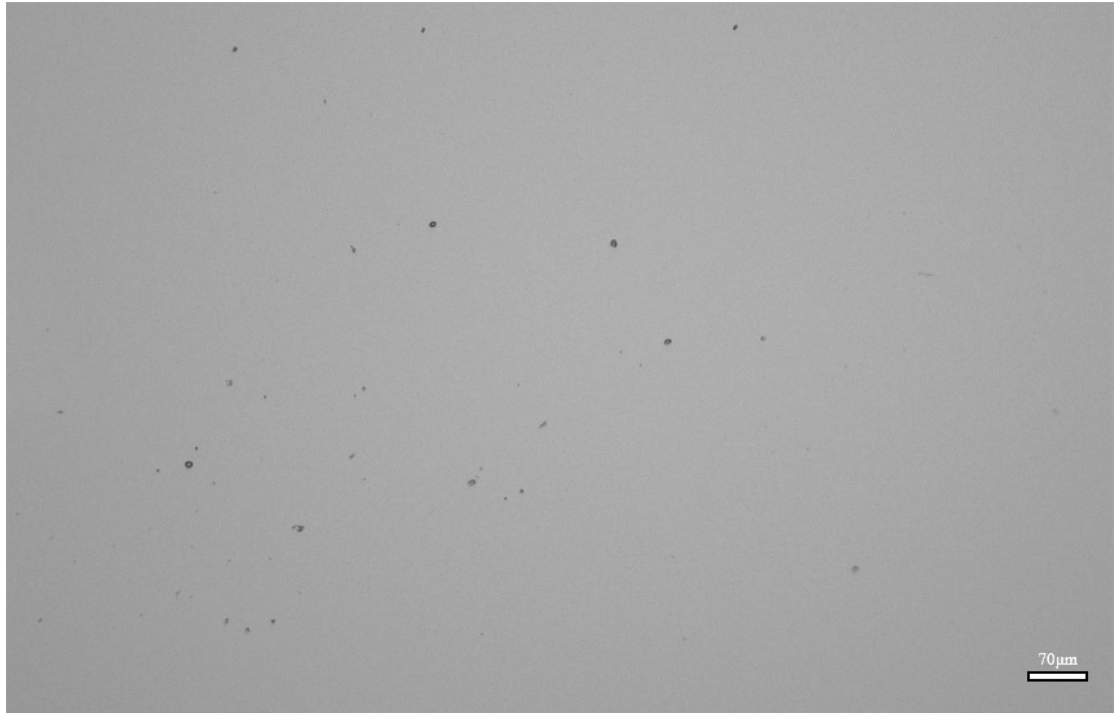

Fig. S3 Optical microscope image of the (010)-oriented surface etched in mixed solution of HF and HNO<sub>3</sub> at 60 °C for 4h
